# Supplementary material for: Improved Motion Artifact Correction in fNIRS Data by Combining Wavelet and Correlation-Based Signal Improvement
Source: MDPI journal article supplement (doi:10.3390/s23083979), 2023-04-14
Supplement: s1 [file s1]

---

Supplemental Table S1. The processing duration for each MA correction method. The durations required for the processing of 41.5 minutes of data recorded in 8 channels (8 HbO and 8 HbR) sampled at 10 Hz. The analysis was run with HOMER3 on a PC with a Windows 10 operating system and an intel® core™ i5-7500 @3.4 GHz processor.

| Method      | Processing time<br>(Sec) |
|-------------|--------------------------|
| Uncorrected | -                        |
| RLOESS      | 690 $\pm$ 6              |
| WCBSI       | 65 $\pm$ 0.2             |
| Wavelet     | 62 $\pm$ 0.2             |
| splineSG    | 21 $\pm$ 0.3             |
| PCA         | 17 $\pm$ 0.5             |
| spline      | 17 $\pm$ 0.4             |
| tPCA        | 16 $\pm$ 0.5             |
| CBSI        | 16 $\pm$ 0.5             |
